# Supplementary material for: Comparative analysis of copy number variations in ulcerative colitis associated and sporadic colorectal neoplasia
Source: Springer Nature journal article supplement (doi:10.1186/s12885-016-2303-4), 2016-04-14
Supplement: MOESM1 [file 10026722]

**Additional File 2: Table S1 to S13****Table S1:** CNVs found in UC-nonprogressor group (UC-NP) group 244k genomic aberration report

| <b>Sl. No</b> | <b>Chr</b> | <b>Start</b> | <b>Stop</b> | <b>Size (in bp)</b> | <b>No of Probes</b> | <b>CNV status</b> | <b>No of Genes</b> |
|---------------|------------|--------------|-------------|---------------------|---------------------|-------------------|--------------------|
| <b>1</b>      | chr1       | 160806847    | 160813371   | 6524                | 2                   | Gain              | 1                  |
| <b>2</b>      | chr2       | 31201435     | 31212189    | 10754               | 2                   | Loss              | 1                  |
| <b>3</b>      | chr3       | 10016304     | 10022512    | 6208                | 2                   | Loss              | 0                  |
| <b>4</b>      | chr3       | 27468786     | 27475123    | 6337                | 2                   | Loss              | 1                  |
| <b>5</b>      | chr3       | 98066674     | 98073706    | 7032                | 2                   | Gain              | 1                  |
| <b>6</b>      | chr4       | 30883071     | 30920449    | 37378               | 2                   | Gain              | 0                  |
| <b>7</b>      | chr4       | 171984321    | 172084742   | 100421              | 4                   | Gain              | 0                  |
| <b>8</b>      | chr7       | 116078828    | 116093617   | 14789               | 2                   | Gain              | 0                  |
| <b>9</b>      | chr7       | 145068068    | 145102088   | 34020               | 2                   | Loss              | 0                  |
| <b>10</b>     | chr8       | 65703020     | 65709344    | 6324                | 2                   | Loss              | 1                  |
| <b>11</b>     | chr10      | 70775982     | 70789507    | 13525               | 2                   | Gain              | 3                  |
| <b>12</b>     | chr15      | 18741516     | 20060261    | 1318745             | 66                  | Gain              | 9                  |
| <b>13</b>     | chr22      | 38482482     | 38491719    | 9237                | 2                   | Gain              | 1                  |
| <b>14</b>     | chr22      | 48806960     | 48814822    | 7862                | 2                   | Gain              | 1                  |
| <b>15</b>     | chrX       | 151773936    | 151781641   | 7705                | 2                   | Loss              | 1                  |

**Table S2:** CNVs found in UC-progressor (UC-P) group 244k genomic aberration report

| <b>Sl. No</b> | <b>Chr</b> | <b>Start</b> | <b>Stop</b> | <b>Size (in bp)</b> | <b>No of Probes</b> | <b>CNV status</b> | <b>No of Genes</b> |
|---------------|------------|--------------|-------------|---------------------|---------------------|-------------------|--------------------|
| 1             | chr2       | 111891328    | 111922721   | 31393               | 2                   | Gain              | 1                  |
| 2             | chr3       | 163997028    | 164101976   | 104948              | 8                   | Loss              | 0                  |
| 3             | chr4       | 69138837     | 69166014    | 27177               | 4                   | Loss              | 0                  |
| 4             | chr5       | 37491262     | 37501689    | 10427               | 2                   | Gain              | 1                  |
| 5             | chr5       | 175590532    | 175600782   | 10250               | 2                   | Gain              | 1                  |
| 6             | chr5       | 176992330    | 177069037   | 76707               | 3                   | Gain              | 1                  |
| 7             | chr7       | 115891901    | 117270069   | 1378168             | 153                 | Gain              | 13                 |
| 8             | chr7       | 127989138    | 128035933   | 46795               | 2                   | Gain              | 0                  |
| 9             | chr8       | 7729111      | 7747972     | 18861               | 2                   | Gain              | 4                  |
| 10            | chr8       | 39356395     | 39488481    | 132086              | 17                  | Loss              | 2                  |
| 11            | chr8       | 127984937    | 128919983   | 935046              | 54                  | Gain              | 5                  |
| 12            | chr8       | 130618090    | 131535168   | 917078              | 98                  | Gain              | 4                  |
| 13            | chr9       | 42362428     | 42903250    | 540822              | 2                   | Gain              | 6                  |
| 14            | chr10      | 89178788     | 89199963    | 21175               | 2                   | Gain              | 0                  |
| 15            | chr11      | 55124530     | 55179155    | 54625               | 9                   | Loss              | 3                  |
| 16            | chr12      | 33654        | 5974091     | 5940437             | 615                 | Gain              | 45                 |
| 17            | chr14      | 37132224     | 37132624    | 1000                | 1                   | Gain              | 1                  |
| 18            | chr15      | 18657188     | 20250086    | 1592898             | 72                  | Gain              | 9                  |
| 19            | chr15      | 30422992     | 30649059    | 226067              | 2                   | Gain              | 2                  |
| 20            | chr15      | 30710135     | 30710535    | 1000                | 1                   | Gain              | 1                  |
| 21            | chr16      | 15091992     | 15159468    | 67476               | 3                   | Gain              | 1                  |
| 22            | chr16      | 18599299     | 18687616    | 88317               | 2                   | Gain              | 0                  |
| 23            | chr22      | 19069125     | 19776005    | 706880              | 106                 | Gain              | 19                 |
| 24            | chrX       | 7542346      | 8091951     | 549605              | 37                  | Loss              | 2                  |
| 25            | chrX       | 90924906     | 90933499    | 8593                | 2                   | Gain              | 1                  |
| 26            | chrY       | 2985364      | 3035107     | 49743               | 3                   | Gain              | 0                  |

**Table S3:** CNVs found in S-CRC group 244k genomic aberration report

| <b>Sl. No</b> | <b>Chr</b> | <b>Start</b> | <b>Stop</b> | <b>Size (in bp)</b> | <b>No of Probes</b> | <b>CNV Status</b> | <b>No of Genes</b> |
|---------------|------------|--------------|-------------|---------------------|---------------------|-------------------|--------------------|
| 1             | chr4       | 43604505     | 43615473    | 10968               | 2                   | Loss              | 0                  |
| 2             | chr4       | 68905470     | 69166014    | 260555              | 12                  | Loss              | 3                  |
| 3             | chr4       | 173665872    | 173666872   | 1000                | 2                   | Gain              | 1                  |
| 4             | chr5       | 37491262     | 37501689    | 10427               | 2                   | Loss              | 1                  |
| 5             | chr5       | 150184990    | 150201345   | 16355               | 2                   | Loss              | 0                  |
| 6             | chr5       | 175590532    | 175600782   | 10250               | 2                   | Loss              | 1                  |
| 7             | chr6       | 32567182     | 32660290    | 93108               | 9                   | Gain              | 3                  |
| 8             | chr8       | 7358840      | 7747972     | 389132              | 4                   | Loss              | 11                 |
| 9             | chr8       | 39080685     | 39094953    | 14268               | 2                   | Loss              | 2                  |
| 10            | chr8       | 39356395     | 39535855    | 179460              | 22                  | Gain              | 2                  |
| 11            | chr8       | 60283407     | 64086021    | 3802614             | 281                 | Gain              | 7                  |
| 12            | chr8       | 126843399    | 130486270   | 3642871             | 193                 | Gain              | 6                  |
| 13            | chr10      | 89178788     | 89241427    | 62639               | 3                   | Loss              | 0                  |
| 14            | chr12      | 3455290      | 5026118     | 1570828             | 155                 | Gain              | 16                 |
| 15            | chr12      | 9528390      | 9585356     | 56966               | 3                   | Gain              | 0                  |
| 16            | chr13      | 48446041     | 48639147    | 193106              | 22                  | Gain              | 0                  |
| 17            | chr13      | 56645352     | 56726208    | 80856               | 7                   | Gain              | 0                  |
| 18            | chr15      | 18741516     | 20220616    | 1479100             | 68                  | Loss              | 9                  |
| 19            | chr20      | 1516766      | 1539355     | 22589               | 3                   | Gain              | 2                  |
| 20            | chr20      | 28265913     | 62379259    | 34113346            | 3101                | Gain              | 381                |
| 21            | chr22      | 22677759     | 22725505    | 47746               | 10                  | Loss              | 3                  |
| 22            | chrY       | 2971061      | 3035107     | 64046               | 4                   | Loss              | 0                  |
| 23            | chrY       | 5633876      | 5672641     | 38765               | 2                   | Loss              | 1                  |
| 24            | chrY       | 15200439     | 15241847    | 41408               | 6                   | Loss              | 1                  |
| 25            | chrY       | 24685122     | 24754407    | 69285               | 2                   | Loss              | 2                  |

**Table S4:** List and details of the overlapping CNV regions between the three of the study sample groups (S-CRC, UC-P and UC-NP)

| Chr   | Start     | Stop      | Size in bp | No of Probes | Gain | Loss | Average Overlap Fraction (Probes) | Sample names           | No of Genes |
|-------|-----------|-----------|------------|--------------|------|------|-----------------------------------|------------------------|-------------|
| chr4  | 68905470  | 69166014  | 260544     | 12           | 0    | 2    | 0.077                             | UC-P and S-CRC         | 3           |
| chr5  | 37491262  | 37501689  | 10427      | 2            | 1    | 1    | 0.5                               | UC-P and S-CRC         | 1           |
| chr5  | 175590532 | 175600782 | 10250      | 2            | 1    | 1    | 0.5                               | UC-P and S-CRC         | 1           |
| chr7  | 115891901 | 117270069 | 1378168    | 153          | 2    | 0    | 0.0065                            | UC-NP and UC-P         | 15          |
| chr8  | 7358840   | 7747972   | 389132     | 4            | 1    | 1    | 0.2                               | UC-P and S-CRC         | 12          |
| chr8  | 39356395  | 39535855  | 179460     | 22           | 1    | 1    | 0.047                             | UC-P and S-CRC         | 2           |
| chr8  | 126843399 | 130486270 | 3642871    | 193          | 2    | 0    | 0.0051                            | UC-P and S-CRC         | 6           |
| chr10 | 89178788  | 89241427  | 62639      | 3            | 1    | 1    | 0.33                              | UC-P and S-CRC         | 0           |
| chr12 | 33654     | 5974091   | 5940437    | 615          | 2    | 0    | 0.0016                            | UC-P and S-CRC         | 54          |
| chr15 | 18657188  | 20250086  | 1592898    | 72           | 2    | 1    | 0.014                             | UC-NP , UC-P and S-CRC | 9           |

**Table S5:** List of unique genes found in UC-progressor CNV data

| Gene Name | Gene ID   | Chromosomal Location | Full Name                                                                                         | Protein Family                                    |
|-----------|-----------|----------------------|---------------------------------------------------------------------------------------------------|---------------------------------------------------|
| SNAP29    | 9342      | 22q11.21             | synaptosomal-associated protein, 29kDa                                                            | SNARE protein                                     |
| RRN3      | 54700     | 16p12                | RRN3 RNA polymerase I transcription factor homolog (S. cerevisiae)                                | transcription factor                              |
| PI4KA     | 5297      | 22q11.21             | phosphatidylinositol 4-kinase, catalytic, alpha                                                   | kinase                                            |
| CACNA2D4  | 93589     | 12p13.33             | calcium channel, voltage-dependent, alpha 2/delta subunit 4                                       | voltage-dependent calcium channel complex         |
| NRIP2     | 83714     | 12p13.33             | nuclear receptor interacting protein 2                                                            | transcription cofactor                            |
| RAD52     | 5893      | 12p13-p12.2          | RAD52 homolog (S. cerevisiae)                                                                     | DNA binding protein                               |
| OR4P4     | 81300     | 11q12.1              | olfactory receptor, family 4, subfamily P, member 4                                               | -                                                 |
| ADIPOR2   | 79602     | 12p13.31             | adiponectin receptor 2                                                                            | receptor                                          |
| PNPLA4    | 8228      | Xp22.3               | patatin-like phospholipase domain containing 4                                                    | acyltransferase                                   |
| NTF3      | 4908      | 12p13                | neurotrophin 3                                                                                    | neurotrophic factor                               |
| FOXD4L4   | 349334    | 9q21.11              | forkhead box D4-like 4                                                                            | transcription factor                              |
| CACNA1C   | 775       | 12p13.3              | calcium channel, voltage-dependent, L type, alpha 1C subunit                                      | voltage-gated calcium channel                     |
| OR4C11    | 219429    | 11q11                | olfactory receptor, family 4, subfamily C, member 11                                              | -                                                 |
| THAP7     | 80764     | 22q11.2              | THAP domain containing 7                                                                          | nucleic acid binding                              |
| SERPIND1  | 3053      | 22q11.21             | serpin peptidase inhibitor, clade D (heparin cofactor), member 1                                  | serine protease inhibitor                         |
| LRTM2     | 654429    | 12p13.33             | leucine-rich repeats and transmembrane domains 2                                                  | -                                                 |
| TMEM191A  | 84222     | 22q11.21             | transmembrane protein 191A (pseudogene)                                                           | -                                                 |
| ITFG2     | 55846     | 12p13.33             | integrin alpha FG-GAP repeat containing 2                                                         | -                                                 |
| AQP7P3    | 441432    | 9p12                 | aquaporin 7 pseudogene 3                                                                          | transporter                                       |
| ARHGAP11A | 9824      | 15q13.2              | Rho GTPase activating protein 11A                                                                 | G-protein modulator                               |
| ZNF74     | 7625      | 22q11.21             | zinc finger protein 74                                                                            | -                                                 |
| FOXD4L2   | 100036519 | 9q21.11              | forkhead box D4-like 2                                                                            | transcription factor                              |
| WNT5B     | 81029     | 12p13.3              | wingless-type MMTV integration site family, member 5B                                             | signaling molecule                                |
| PCDH11X   | 27328     | Xq21.3               | protocadherin 11 X-linked                                                                         | cadherin                                          |
| LZTR1     | 8216      | 22q11.1-q11.2        | leucine-zipper-like transcription regulator 1                                                     | -                                                 |
| POM121L4P | 266697    | 22q11.2              | POM121 transmembrane nucleoporin-like 4 pseudogene                                                | -                                                 |
| ERC1      | 23085     | 12p13.3              | ELKS/RAB6-interacting/CAST family member 1                                                        | membrane traffic protein                          |
| CCDC77    | 84318     | 12p13.33             | coiled-coil domain containing 77                                                                  | -                                                 |
| VCX       | 26609     | Xp22                 | variable charge, X-linked                                                                         | -                                                 |
| SLC7A4    | 6545      | 22q11.21             | solute carrier family 7 (orphan transporter), member 4                                            | amino acid transporter                            |
| P2RX6     | 9127      | 22q11.21             | purinergic receptor P2X, ligand-gated ion channel, 6                                              | ligand-gated ion channel                          |
| CFTR      | 1080      | 7q31.2               | cystic fibrosis transmembrane conductance regulator (ATP-binding cassette sub-family C, member 7) | anion channel                                     |
| ASAP1     | 50807     | 8q24.1-q24.2         | ArfGAP with SH3 domain, ankyrin repeat and PH domain 1                                            | nucleic acid binding                              |
| WNK1      | 65125     | 12p13.3              | WNK lysine deficient protein kinase 1                                                             | non-receptor serine/threonine protein kinase      |
| FKBP4     | 2288      | 12p13.33             | FK506 binding protein 4, 59kDa                                                                    | isomerase                                         |
| P2RX6P    | 440799    | 22q11.21             | purinergic receptor P2X, ligand-gated ion channel, 6 pseudogene                                   | -                                                 |
| AIFM3     | 150209    | 22q11.21             | apoptosis-inducing factor, mitochondrion-associated, 3                                            | dehydrogenase                                     |
| KLHL22    | 84861     | 22q11.21             | kelch-like 22 (Drosophila)                                                                        | -                                                 |
| FAM49B    | 51571     | 8q24.21              | family with sequence similarity 49, member B                                                      | -                                                 |
| OR4S2     | 219431    | 11q11                | olfactory receptor, family 4, subfamily S, member 2                                               | -                                                 |
| IQSEC3    | 440073    | 12p13.33             | IQ motif and Sec7 domain 3                                                                        | guanyl-nucleotide exchange factor                 |
| CAV2      | 858       | 7q31.1               | caveolin 2                                                                                        | transmembrane receptor regulatory/adaptor protein |
| ST7       | 7982      | 7q31.2               | suppression of tumorigenicity 7                                                                   | -                                                 |

|                   |                  |                         |                                                                                                 |                                                    |
|-------------------|------------------|-------------------------|-------------------------------------------------------------------------------------------------|----------------------------------------------------|
| <b>SCARF2</b>     | <b>91179</b>     | 22q11                   | scavenger receptor class F, member 2                                                            | receptor                                           |
| <b>CTTNBP2</b>    | <b>83992</b>     | 7q31                    | cortactin binding protein 2                                                                     | non-receptor serine/threonine protein kinase       |
| <b>MED15</b>      | <b>51586</b>     | 22q11.2                 | mediator complex subunit 15                                                                     | -                                                  |
| <b>SLC6A13</b>    | <b>6540</b>      | 12p13.3                 | solute carrier family 6 (neurotransmitter transporter, GABA), member 13                         | cation transporter                                 |
| <b>MET</b>        | <b>4233</b>      | 7q31                    | met proto-oncogene (hepatocyte growth factor receptor)                                          | -                                                  |
| <b>GSDMC</b>      | <b>56169</b>     | 8q24.21                 | gasdermin C                                                                                     | -                                                  |
| <b>LOC202181*</b> | <b>202181</b>    | 5q35.3                  | chromosome 5 open reading frame 25 pseudogene (SUMO-interacting motifs containing 1 pseudogene) |                                                    |
| <b>VWF</b>        | <b>7450</b>      | 12p13.3                 | von Willebrand factor                                                                           | extracellular matrix glycoprotein                  |
| <b>CAV1</b>       | <b>857</b>       | 7q31.1                  | caveolin 1, caveolae protein, 22kDa                                                             | transmembrane receptor regulatory/adaptor protein  |
| <b>CAPZA2</b>     | <b>830</b>       | 7q31.2-q31.3            | capping protein (actin filament) muscle Z-line, alpha 2                                         | non-motor actin binding protein                    |
| <b>B4GALNT3</b>   | <b>283358</b>    | 12p13.33                | beta-1,4-N-acetyl-galactosaminyl transferase 3                                                  | glycosyltransferase                                |
| <b>DCPIB</b>      | <b>196513</b>    | 12p13.33                | DCPI decapping enzyme homolog B (S. cerevisiae)                                                 | transcription cofactor                             |
| <b>TEAD4</b>      | <b>7004</b>      | 12p13.3-p13.2           | TEA domain family member 4                                                                      | transcription factor                               |
| <b>LOC541471*</b> | <b>541471</b>    |                         | uncharacterized LOC541471                                                                       |                                                    |
| <b>NINJ2</b>      | <b>4815</b>      | 12p13                   | ninjurin 2                                                                                      | cell adhesion molecule                             |
| <b>TULP3</b>      | <b>7289</b>      | 12p13.3                 | tubby like protein 3                                                                            | -                                                  |
| <b>FOXM1</b>      | <b>2305</b>      | 12p13                   | forkhead box M1                                                                                 | transcription factor                               |
| <b>ANKRD20A3</b>  | <b>441425</b>    | 9p12                    | ankyrin repeat domain 20 family, member A3                                                      | -                                                  |
| <b>FBXL14</b>     | <b>144699</b>    | 12p13.33                | F-box and leucine-rich repeat protein 14                                                        | -                                                  |
| <b>FAM95B1*</b>   | <b>100133036</b> | 9p12                    | family with sequence similarity 95, member B1                                                   | -                                                  |
| <b>SLC6A12</b>    | <b>6539</b>      | 12p13                   | solute carrier family 6 (neurotransmitter transporter, betaine/GABA), member 12                 | cation transporter                                 |
| <b>ANKRD20A2</b>  | <b>441430</b>    | 9p12                    | ankyrin repeat domain 20 family, member A2                                                      | -                                                  |
| <b>WNT2</b>       | <b>7472</b>      | 7q31.2                  | wingless-type MMTV integration site family member 2                                             | signaling molecule                                 |
| <b>KDM5A</b>      | <b>5927</b>      | 12p11                   | lysine (K)-specific demethylase 5A                                                              | zinc finger transcription factor                   |
| <b>ANO2</b>       | <b>57101</b>     | 12p13.3                 | anoctamin 2                                                                                     | Calcium Activated Chloride Channel                 |
| <b>FOXA1</b>      | <b>3169</b>      | 14q21.1                 | forkhead box A1                                                                                 | transcription factor                               |
| <b>TSPAN9</b>     | <b>10867</b>     | 12p13.33-p13.32         | tetraspanin 9                                                                                   | membrane-bound signaling molecule                  |
| <b>CRKL</b>       | <b>1399</b>      | 22q11.21                | v-crk sarcoma virus CT10 oncogene homolog (avian)-like                                          | activate the RAS and JUN kinase signaling pathways |
| <b>ASZ1</b>       | <b>136991</b>    | 7q31.2                  | Ankyrin Repeat, SAM And Basic Leucine Zipper Domain Containing 1                                | signal transducer activity                         |
| <b>ST7OT1*</b>    | <b>93653</b>     | 7q31.2                  | ncRNA                                                                                           | -                                                  |
| <b>C12orf32</b>   | <b>83695</b>     | 12p13.33                | RAD9-HUS1-RAD1 interacting nuclear orphan 1                                                     | DNA damage response (DDR) signaling                |
| <b>FAM7A1*</b>    | <b>89838</b>     | 15q13.3                 | ULK4 pseudogene 1                                                                               | -                                                  |
| <b>ST7OT3</b>     | <b>93655</b>     | 7q31.3                  | ST7 overlapping transcript 3                                                                    | -                                                  |
| <b>ST7OT2*</b>    | <b>93654</b>     | 7q31.2                  | ncRNA                                                                                           | -                                                  |
| <b>HSN2</b>       | <b>NULL</b>      | Alternate name for WNK1 | WNK lysine deficient protein kinase 1                                                           | WNK subfamily of serine/threonine protein kinases  |
| <b>ST7OT4*</b>    | <b>338069</b>    | 7q31.2                  | ncRNA                                                                                           | -                                                  |
| <b>DDEF1IT1*</b>  | <b>29065</b>     | 8q24.21                 | ncRNA                                                                                           | -                                                  |
| <b>FAM7A2*</b>    | <b>100288380</b> | 15q13.2                 | ULK4 pseudogene 2                                                                               | -                                                  |
| <b>MGC16703*</b>  | <b>113691</b>    | 22q11.21                | tubulin, alpha 3f, pseudogene                                                                   | -                                                  |
| <b>LRRC74B</b>    | <b>400891</b>    | 22q11.21                | leucine rich repeat containing 74B                                                              | laminin binding                                    |
| <b>FLJ39582*</b>  | <b>439931</b>    | 22q11.21                | Uncharacterized Protein FLJ39582-Like                                                           | RNA Gene                                           |

\*nc RNA, Pseudogenes or experimental level data for proteins is not available

**Table S6:** List of miRNAs overlapping to uniquely shared CNV regions of different sample groups

| <b>Chr</b>    | <b>Sample</b>   | <b>miRNAs</b>                                                                                                                                                                                                                                                              |
|---------------|-----------------|----------------------------------------------------------------------------------------------------------------------------------------------------------------------------------------------------------------------------------------------------------------------------|
| <b>Chr 8</b>  | S-CRC and UC-P* | hsa-mir-1204* , hsa-mir-1205 , hsa-mir-1206 , hsa-mir-1207 , hsa-mir-1208                                                                                                                                                                                                  |
| <b>Chr 15</b> | S-CRC and UC-P  | hsa-mir-1268                                                                                                                                                                                                                                                               |
| <b>Chr 20</b> | S-CRC           | hsa-mir-1825, hsa-mir-644, hsa-mir-499, hsa-mir-1289-1, hsa-mir-1259, hsa-mir-645, hsa-mir-1302-5, hsa-mir-296, hsa-mir-298, hsa-mir-646, hsa-mir-1257, hsa-mir-1-1, hsa-mir-133a-2, hsa-mir-124-3, hsa-mir-941-1, hsa-mir-941-2, hsa-mir-941-3, hsa-mir-1914, hsa-mir-647 |
| <b>Chr 22</b> | UC-P            | hsa-mir-649                                                                                                                                                                                                                                                                |
| <b>Chr X</b>  | UC-P            | hsa-mir-651                                                                                                                                                                                                                                                                |

Note: \*present commonly in both UC-P and S-CRC

**Table S7:** Comparative analysis of all CNVs observed in different sub-groups with the data from The Cancer Genome Atlas Network (TCGA) project for CRC

| 244k aCGH S-CRC – CNVR data |              |            |             |               | CGAP data  |              |            |             |               |
|-----------------------------|--------------|------------|-------------|---------------|------------|--------------|------------|-------------|---------------|
| <i>Chr</i>                  | <i>Start</i> | <i>End</i> | <i>Size</i> | <i>Status</i> | <i>Chr</i> | <i>Start</i> | <i>End</i> | <i>Size</i> | <i>Status</i> |
| chr4                        | 173665872    | 173666272  | 1000        | <b>AMP</b>    | chr4       | 148868312    | 191273063  | 42404751    | <b>DEL</b>    |
| chr8                        | 7358840      | 7747972    | 389132      | <b>DEL</b>    | chr8       | 3609468      | 39891310   | 36281842    | <b>DEL</b>    |
| chr8                        | 39080685     | 39094953   | 14268       | <b>DEL</b>    | chr8       | 3609468      | 39891310   | 36281842    | <b>DEL</b>    |
| chr8                        | 39080685     | 39094953   | 14268       | <b>DEL</b>    | chr8       | 31150731     | 48817264   | 17666533    | <b>DEL</b>    |
| chr8                        | 39356395     | 39535855   | 179460      | <b>DEL</b>    | chr8       | 3609468      | 39891310   | 36281842    | <b>DEL</b>    |
| chr8                        | 39356395     | 39535855   | 179460      | <b>DEL</b>    | chr8       | 31150731     | 48817264   | 17666533    | <b>DEL</b>    |
| chr8                        | 126843399    | 130486270  | 3642871     | <b>AMP</b>    | chr8       | 128222988    | 129039208  | 816220      | <b>AMP</b>    |
| chr12                       | 3455290      | 5026118    | 1570828     | <b>AMP</b>    | chr12      | 2980135      | 4569646    | 1589511     | <b>AMP</b>    |
| chr15                       | 18741516     | 20220616   | 1479100     | <b>DEL</b>    | chr15      | 1            | 43105206   | 43105205    | <b>DEL</b>    |
| chr20                       | 28265913     | 62379259   | 34113346    | <b>AMP</b>    | chr20      | 41763214     | 42791312   | 1028098     | <b>AMP</b>    |
| chr20                       | 28265913     | 62379259   | 34113346    | <b>AMP</b>    | chr20      | 29339506     | 29741647   | 402141      | <b>AMP</b>    |
| chr20                       | 28265913     | 62379259   | 34113346    | <b>AMP</b>    | chr20      | 51575611     | 62435964   | 10860353    | <b>AMP</b>    |
| 244k aCGH UC-P – CNVR data  |              |            |             |               | CGAP data  |              |            |             |               |
| chr8                        | 7729111      | 7747972    | 18861       | <b>AMP</b>    | chr8       | 3609468      | 39891310   | 36281842    | <b>DEL</b>    |
| chr8                        | 39356395     | 39488481   | 132086      | <b>DEL</b>    | chr8       | 31150731     | 48817264   | 17666533    | <b>DEL</b>    |
| chr8                        | 39356395     | 39488481   | 132086      | <b>DEL</b>    | chr8       | 3609468      | 39891310   | 36281842    | <b>DEL</b>    |
| chr8                        | 127984937    | 128919983  | 935046      | <b>AMP</b>    | chr8       | 128222988    | 129039208  | 816220      | <b>AMP</b>    |
| chr12                       | 33654        | 5974091    | 5940437     | <b>AMP</b>    | chr12      | 2980135      | 4569646    | 1589511     | <b>AMP</b>    |
| chr15                       | 18657188     | 20250086   | 1592898     | <b>AMP</b>    | chr15      | 1            | 43105206   | 43105205    | <b>DEL</b>    |
| chr15                       | 30422992     | 30649059   | 226067      | <b>AMP</b>    | chr15      | 1            | 43105206   | 43105205    | <b>DEL</b>    |
| chr15                       | 30710135     | 30710535   | 400         | <b>AMP</b>    | chr15      | 1            | 43105206   | 43105205    | <b>DEL</b>    |
| 244k aCGH UC-NP – CNVR data |              |            |             |               | CGAP data  |              |            |             |               |
| chr1                        | 160806847    | 160813371  | 6524        | <b>AMP</b>    | chr1       | 116945608    | 188847994  | 71902386    | <b>AMP</b>    |
| chr4                        | 171984321    | 172084742  | 100421      | <b>AMP</b>    | chr4       | 148868312    | 191273063  | 42404751    | <b>DEL</b>    |
| chr15                       | 18741516     | 20060261   | 1318745     | <b>AMP</b>    | chr15      | 1            | 43105206   | 43105205    | <b>DEL</b>    |

Note: Chr: chromosome; Size in base pairs; AMP: amplification; DEL: deletion; CGAP: cancer genome atlas project; CNVR-Copy number variation regions



**Table S8:** Gene set enrichment analysis (GSEA) for S-CRC group CNV associated genes

|                              | Cytokines and growth factors | Transcription factors | Cell differentiation markers | Protein kinase | Translocated cancer genes | Oncogenes | Tumor suppressor |
|------------------------------|------------------------------|-----------------------|------------------------------|----------------|---------------------------|-----------|------------------|
| Tumor suppressor             | 0                            | 0                     | 0                            | 0              | 0                         | 0         | 1                |
| Oncogenes                    | 0                            | 2                     | 0                            | 0              | 5                         | <b>6*</b> |                  |
| Translocated cancer genes    | 0                            | 2                     | 0                            | 0              | 5                         |           |                  |
| Protein kinase               | 0                            | 0                     | 0                            | 10             |                           |           |                  |
| Cell differentiation markers | 0                            | 0                     | 3                            |                |                           |           |                  |
| Transcription factors        | 0                            | 36                    |                              |                |                           |           |                  |
| Cytokines and growth factors | 7                            |                       |                              |                |                           |           |                  |

Note: (6\* oncogenes are CCND2, MYC, TOP1, GNAS, MAFB, SS1BL1)

**Table S9:** Gene set enrichment analysis (GSEA) for UC-P group CNV associated genes

|                                     | Cytokines and growth factors | Transcription factors | Cell differentiation markers | Protein kinase | Translocated cancer genes | Oncogenes | Tumor suppressor |
|-------------------------------------|------------------------------|-----------------------|------------------------------|----------------|---------------------------|-----------|------------------|
| <b>Tumor suppressor</b>             | 0                            | 0                     | 0                            | 0              | 0                         | 0         | 0                |
| <b>Oncogenes</b>                    | 0                            | 1                     | 0                            | 1              | 4                         | <b>5*</b> |                  |
| <b>Translocated cancer genes</b>    | 0                            | 1                     | 0                            | 0              | 4                         |           |                  |
| <b>Protein kinase</b>               | 0                            | 0                     | 0                            | 3              |                           |           |                  |
| <b>Cell differentiation markers</b> | 0                            | 0                     | 0                            |                |                           |           |                  |
| <b>Transcription factors</b>        | 0                            | 10                    |                              |                |                           |           |                  |
| <b>Cytokines and growth factors</b> | 4                            |                       |                              |                |                           |           |                  |

Note: (5\* oncogenes are CCND2, MYC, ERCC1, MET, KDM5A)

**Table S10:** The functional KEGG pathways enriched with genes located on the chromosomal segments with copy number alterations in S-CRC and UC-P samples

| Sample | Pathways                   | No. of Genes | P Value  |
|--------|----------------------------|--------------|----------|
| UC-P   | MAPK signaling pathway     | 7            | 0.005652 |
|        | Focal adhesion             | 6            | 0.007739 |
|        | Pathways in cancer         | 7            | 0.014941 |
|        | Wnt signaling pathway      | 4            | 0.068003 |
|        | Melanoma                   | 3            | 0.072888 |
| S-CRC  | Viral myocarditis          | 5            | 0.036291 |
|        | TGF-beta signaling pathway | 5            | 0.057384 |
|        | Asthma                     | 3            | 0.091450 |
|        | Pathways in cancer         | 3            | 0.092456 |
|        | O-Glycan biosynthesis      | 3            | 0.097959 |

Note: UC-P: ulcerative colitis progressors; S-CRC: sporadic colorectal cancer

**Table S11:** Prediction accuracy of colorectal neoplasia using the 6-gene panel instability signature along with MSI

|                       | <i>Sensitivity (Range)</i> | <i>Specificity (Range)</i> | <i>Overall positive (Frequency)</i> |
|-----------------------|----------------------------|----------------------------|-------------------------------------|
| <i>S-CRN</i>          | 54.08 (43-64)              | 86.66 (69-96)              | 53/98 (54.1%)                       |
| <i>S-CRN with MSI</i> | 58.16 (47-68)              | 86.66 (69-96)              | 57/98 (58.2%)                       |
| <i>UC-CRN</i>         | 29.03 (14-48)              | 86.66 (69-96)              | 9/31(29%)                           |

**Table S12:** Details of TaqMan CNV assays used in the microarray validation study

| <b>Gene</b>    | <b>HsID</b>   | <b>Chromosomal Location</b> | <b>Dye-Quencher</b> | <b>Product Size</b> | <b>Assays Available</b> |
|----------------|---------------|-----------------------------|---------------------|---------------------|-------------------------|
| <b>C-MYC</b>   | Hs02045885_cn | Chr.8:128753146             | FAM-NFQ/MGB         | 100 bp              | Pre-designed            |
| <b>MYCN</b>    | Hs00824796_cn | Chr.2:16080783              | FAM-NFQ/MGB         | 106 bp              | Pre-designed            |
| <b>CCND1</b>   | Hs01425024_cn | Chr.11:69456213             | FAM-NFQ/MGB         | 95 bp               | Pre-designed            |
| <b>CCND2</b>   | MAHE_CNV      | Chr.12: 4385847             | FAM-NFQ/MGB         | 102 bp              | Custom                  |
| <b>EGFR</b>    | MAHE90017867  | chr7:55259406               | FAM-NFQ/MGB         | 89 bp               | Custom                  |
| <b>FNDC3A</b>  | Hs06372619_cn | Chr.13:49570034             | FAM-NFQ/MGB         | 109 bp              | Pre-designed            |
| <b>UGT2B17</b> | Hs04282679_cn | Chr.4:69428283              | FAM-NFQ/MGB         | 99 bp               | Pre-designed            |
| <b>RNaseP</b>  | 4403326       | Chr14                       | VIC-TAMARA          |                     | Pre-designed            |

**Table S13:** Details of antibodies and staining conditions used for Immunohistochemistry (IHC)

| <b>Primary antibody</b> | <b>Source</b> | <b>clone</b> | <b>localization</b>        | <b>Host</b> | <b>Method</b>              |
|-------------------------|---------------|--------------|----------------------------|-------------|----------------------------|
| <b>Ki67</b>             | ScyTek        | SP6          | Nuclear                    | Rabbit      | ARS + 1 hr incubation      |
| <b>P53</b>              | ScyTek        | DO-7         | Nuclear                    | Mouse       | ARS + 1 hr incubation      |
| <b>EGFR</b>             | Quartett      | 111.6        | Cytoplasm, plasma membrane | Mouse       | ARS + 1 hr incubation      |
| <b>ERBB2</b>            | ScyTek        | SP3          | Cell membrane              | Rabbit      | ARS + 1 hr incubation      |
| <b>Cyclin D1</b>        | Quartett      | DCS-6        | ----                       | Mouse       | ARS + 1 hr incubation      |
| <b>FNDC3A</b>           | Abcam         | M01          | Endoplasmic reticulum      | Rabbit      | ARS + Overnight incubation |
| <b>AMACR</b>            | DAKO          | 13H4         | Plasma membrane vesicles   | Rabbit      | ARS + 1 hr incubation      |
| <b>C-MYC</b>            | Quartett      | 9E10.3       | Nuclear                    | Mouse       | ARS + 1 hr incubation      |

*Note: ARS: Antigen retrieval system: using microwave and citrate buffer pH 6.0 and 7.4*
