# Supplementary material for: Comparative analysis of copy number variations in ulcerative colitis associated and sporadic colorectal neoplasia
Source: Springer Nature journal article supplement (doi:10.1186/s12885-016-2303-4), 2016-04-14
Supplement: MOESM2 [file 10026722]

Additional File 1: Figure S1 to S8

Figure S1

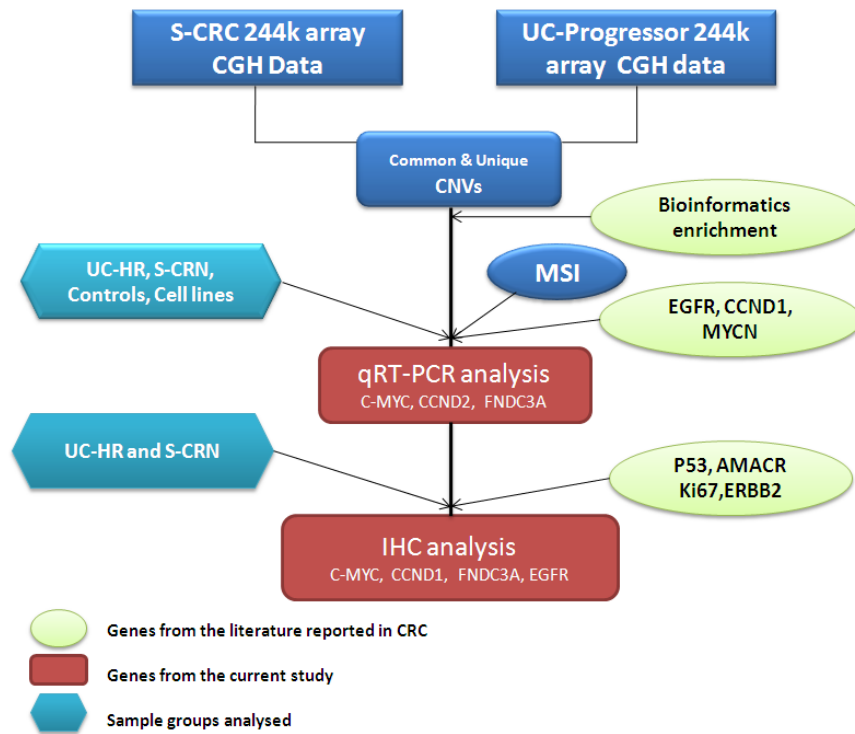

Figure S1: Overall workflow and design of the study.

**Figure S2**

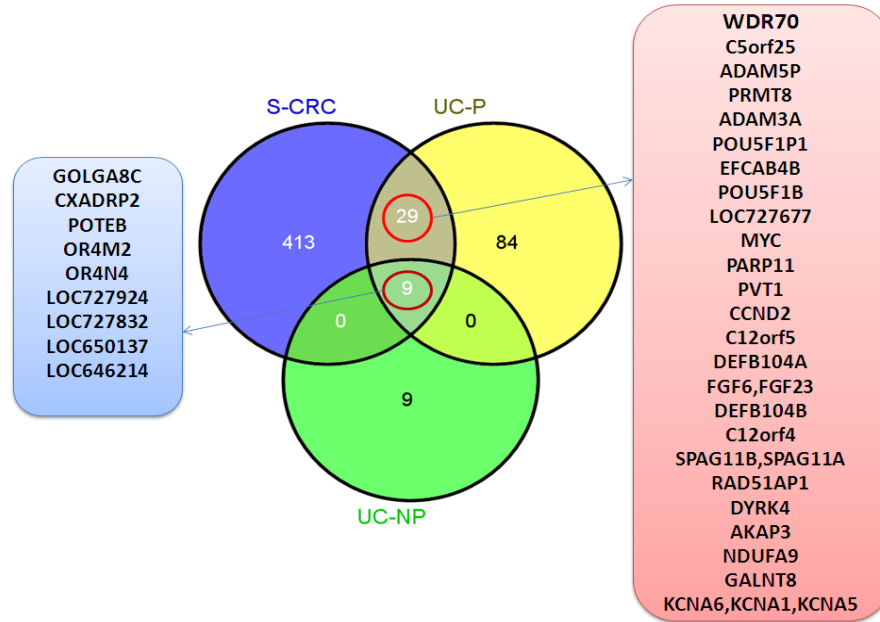

**Figure S2:** Common genes found associated with CNVs in three groups.

**Figure S3**

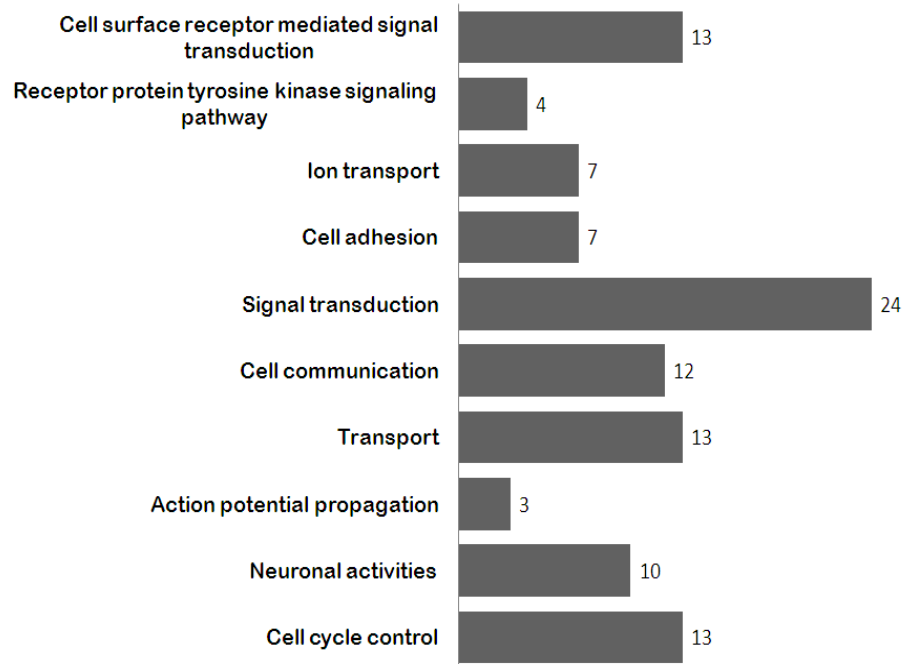

**Figure S3:** Enrichment in biological process (GO analysis) of the gene lists from S-CRC and UC-P samples 244k aCGH data. X-axis: number of genes involved in the given function and Y-axis: Biological function the genes are involved.

**Figure S4**

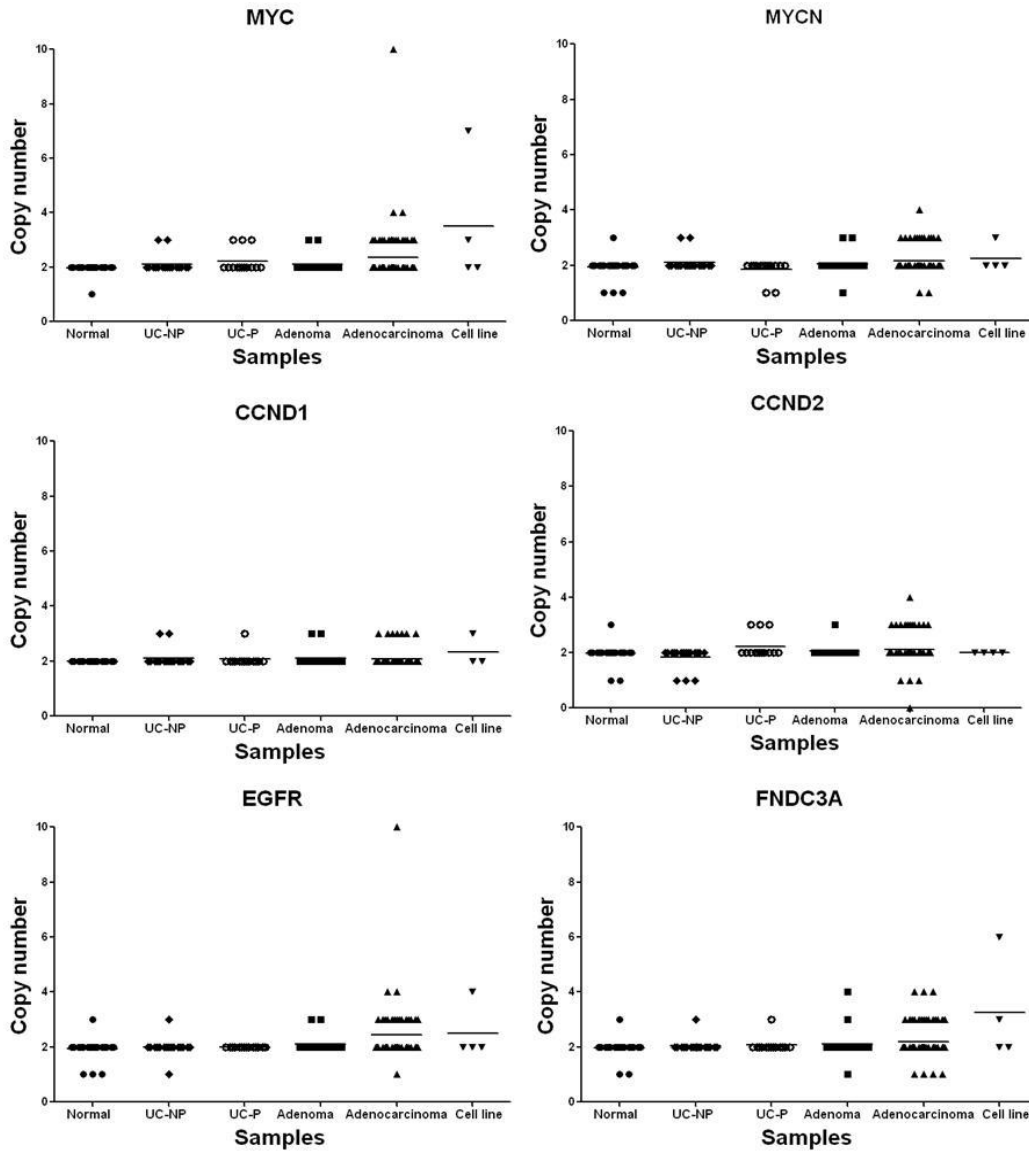

**Figure S4:** Results from the screening of gene alterations (amplification and deletion) in subgroups of sporadic and ulcerative colorectal neoplasm samples in our validation panel of markers by qRT-PCR method. (Abbreviations used are as given earlier)

**Figure S5**

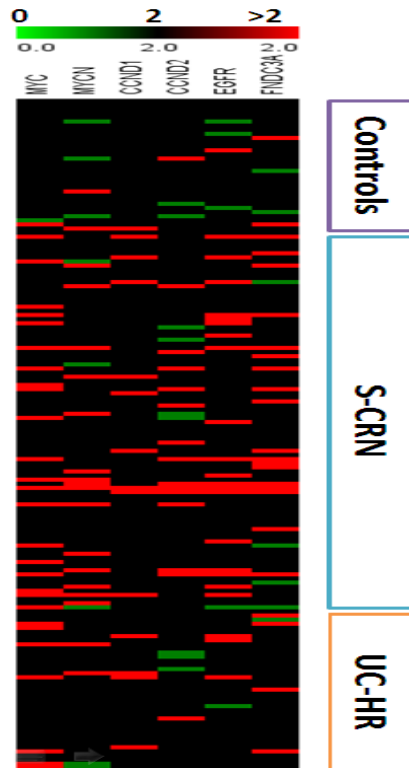

**Figure S5:** Clustering of qRT-PCR data using 6 genes and 163 samples of different groups. The relative copy number for each gene was plotted against different sample groups in the current study.

**Figure S6**

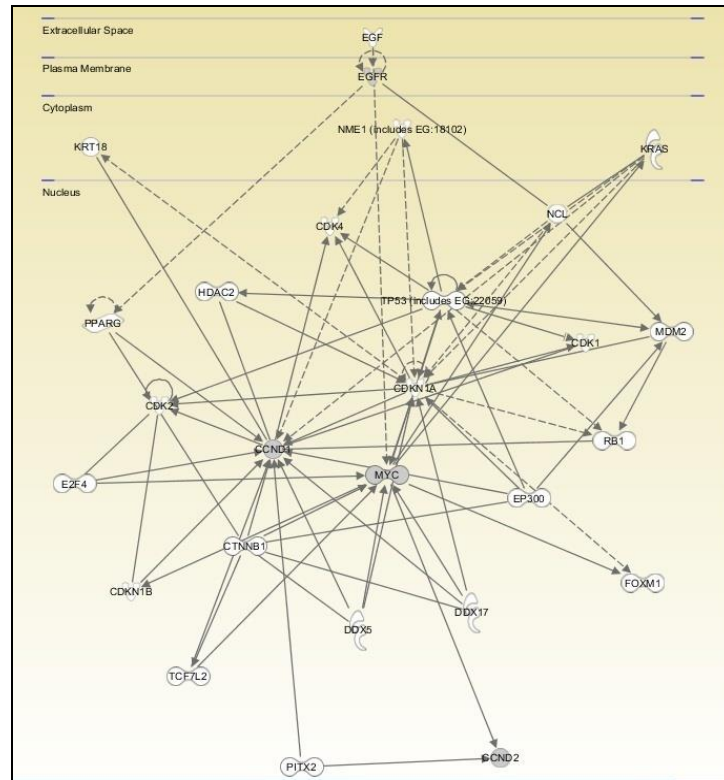

**Figure S6:** Summary of Ingenuity Pathways Analysis (IPA) for the role and interaction of the 6 genes of the markers panel

**Figure S7**

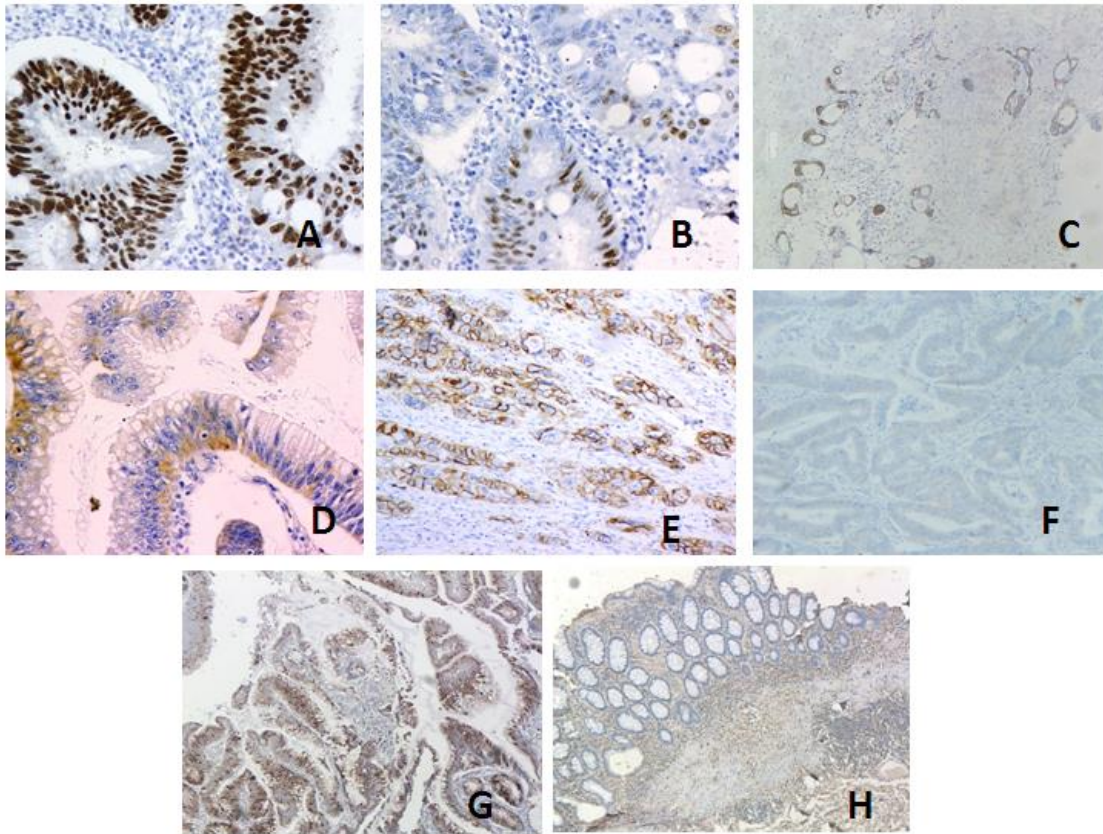

**Figure S7:** Results of immunohistochemistry analysis carried out on UC associated and sporadic colorectal cancer samples for various proteins; images in order **A:** p53 **B:** Cyclin D1; **C:** AMACR; **D:** EGFR; **E:** C-MYC; **F:** ERBB2; **G:** Ki67; **H:** FNDC3A.

**Figure S8**

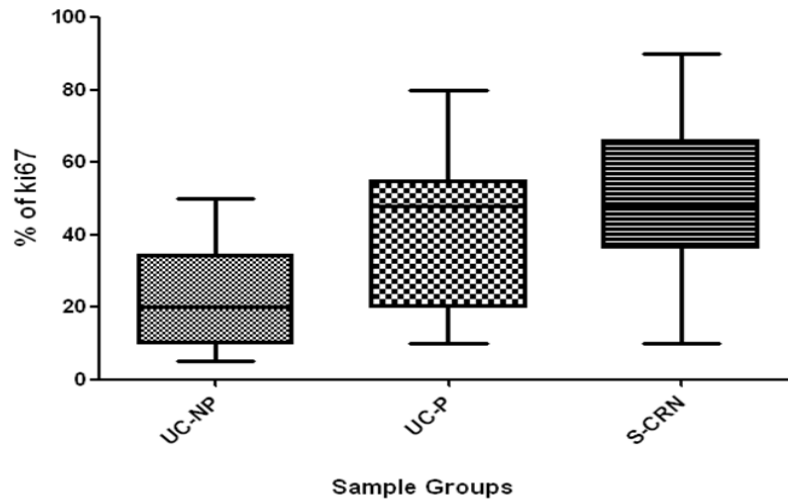

**Figure S8:** Box plot illustrating percentage of Ki-67 positive cells in different sample groups of the current study: ulcerative colitis-non progressor (UC-NP) group, ulcerative colitis- progressor (UC-P) group and sporadic colorectal neoplasia (S-CRN) group.
